# Supplementary material for: Polycyclic motif engineering in cyanostilbene-based donors towards highly efficient modulable emission properties in two-component systems
Source: Royal Society of Chemistry journal article supplement (doi:10.1039/d1ce00959a), 2021-01-01
Supplement: d1ce00959a1.pdf [file d1ce00959a1.pdf]

## Supporting Information

### **Polycyclic Motifs Engineering in Cynaostilbene Based Donors Towards Highly Efficient Modulable Emission Properties in Two-Component System**

Arshad Khan<sup>a\*</sup>, Rabia Usman<sup>a\*</sup>, Rongrong Li<sup>b</sup>, Melek Hajji<sup>c</sup>, Haiming Tang<sup>a</sup>, Di Ma<sup>a</sup>

<sup>a</sup> *School of Chemistry and Environmental Engineering, Sichuan University of Science & Engineering, Zigong 643000, Sichuan, P. R. China*

<sup>b</sup> *School of Pharmaceutical Chemical and Materials Engineering, Taizhou University, Taizhou, Zhejiang, 318000, P. R. China.*

<sup>c</sup> *Research Unit: Electrochemistry, Materials and Environment, University of Kairouan, 3100 Kairouan, Tunisia*

\*Corresponding authors. E-mail address: [arshadkhan@seu.edu.cn](mailto:arshadkhan@seu.edu.cn) (A.K.), [arshaibar@gmail.com](mailto:arshaibar@gmail.com)  
(R.U.)

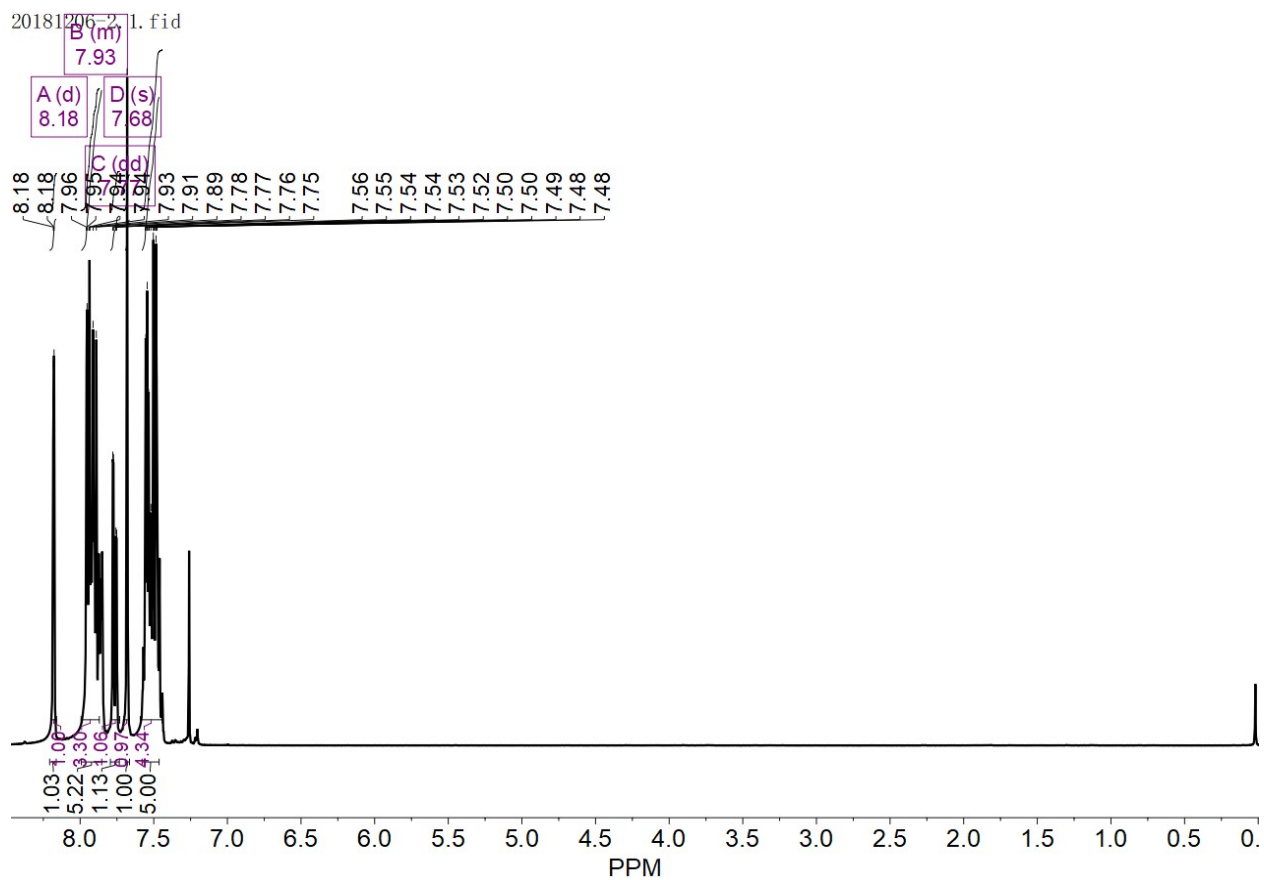

**Figure S1.**  $^1\text{H}$ NMR of NPN

$^1\text{H}$  NMR (400 MHz, Chloroform-*d*)  $\delta$  8.18 (d,  $J = 2.0$  Hz, 1H), 7.99 – 7.87 (m, 5H), 7.77 (dd,  $J = 8.7, 2.0$  Hz, 1H), 7.68 (s, 1H), 7.59 – 7.44 (m, 5H).

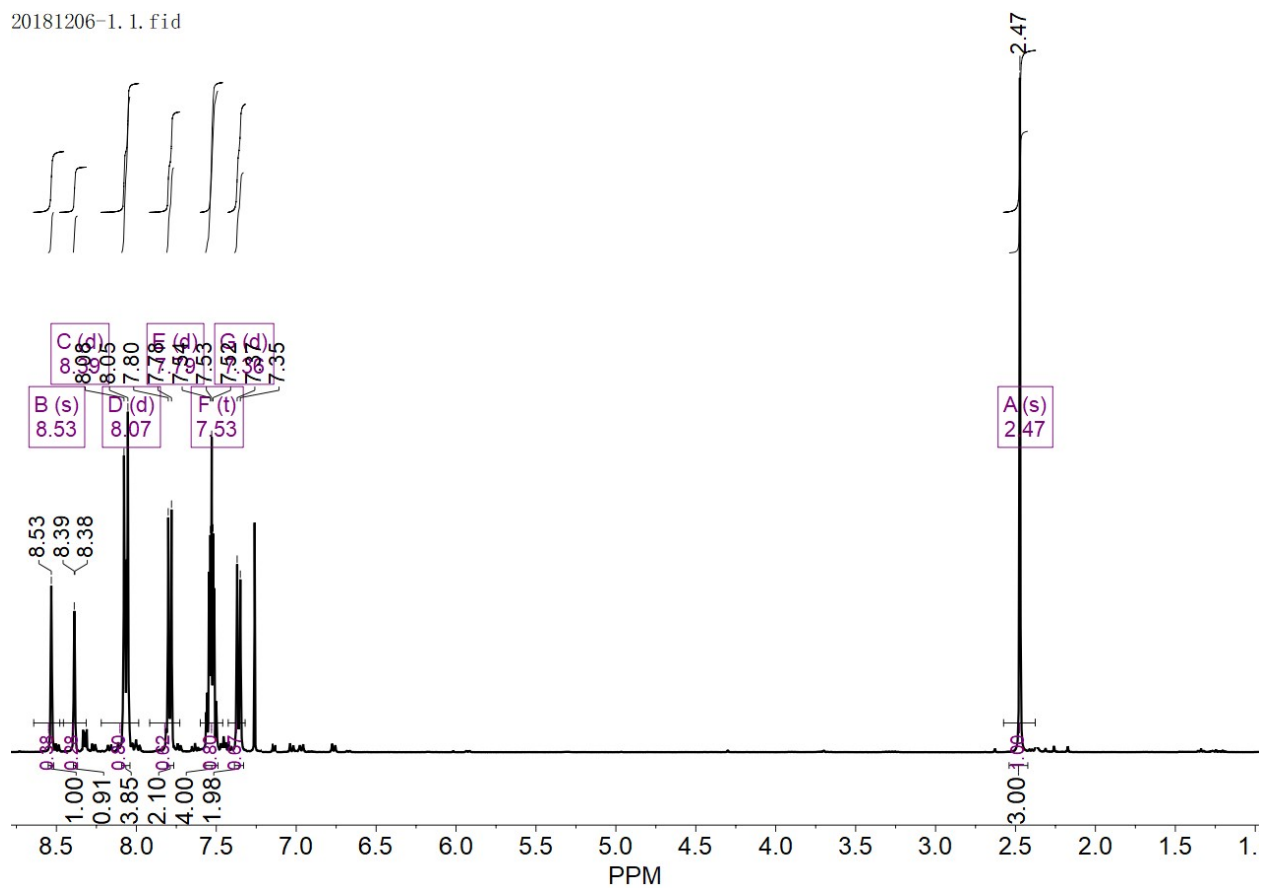

**Figure S2.**  $^1\text{H}$ NMR of ATN

$^1\text{H}$  NMR (400 MHz, Chloroform-*d*)  $\delta$  8.53 (s, 1H), 8.39 (d,  $J = 1.5$  Hz, 1H), 8.07 (d,  $J = 9.8$  Hz, 3.85H), 7.80 (d,  $J = 8.3$  Hz, 2H), 7.79 (d,  $J = 8.3$  Hz, 2H), 7.53 (t,  $J = 3.3$  Hz, 4H), 7.36 (d,  $J = 8.0$  Hz, 2H), 2.47 (s, 3H).

20181206-6.1.fid

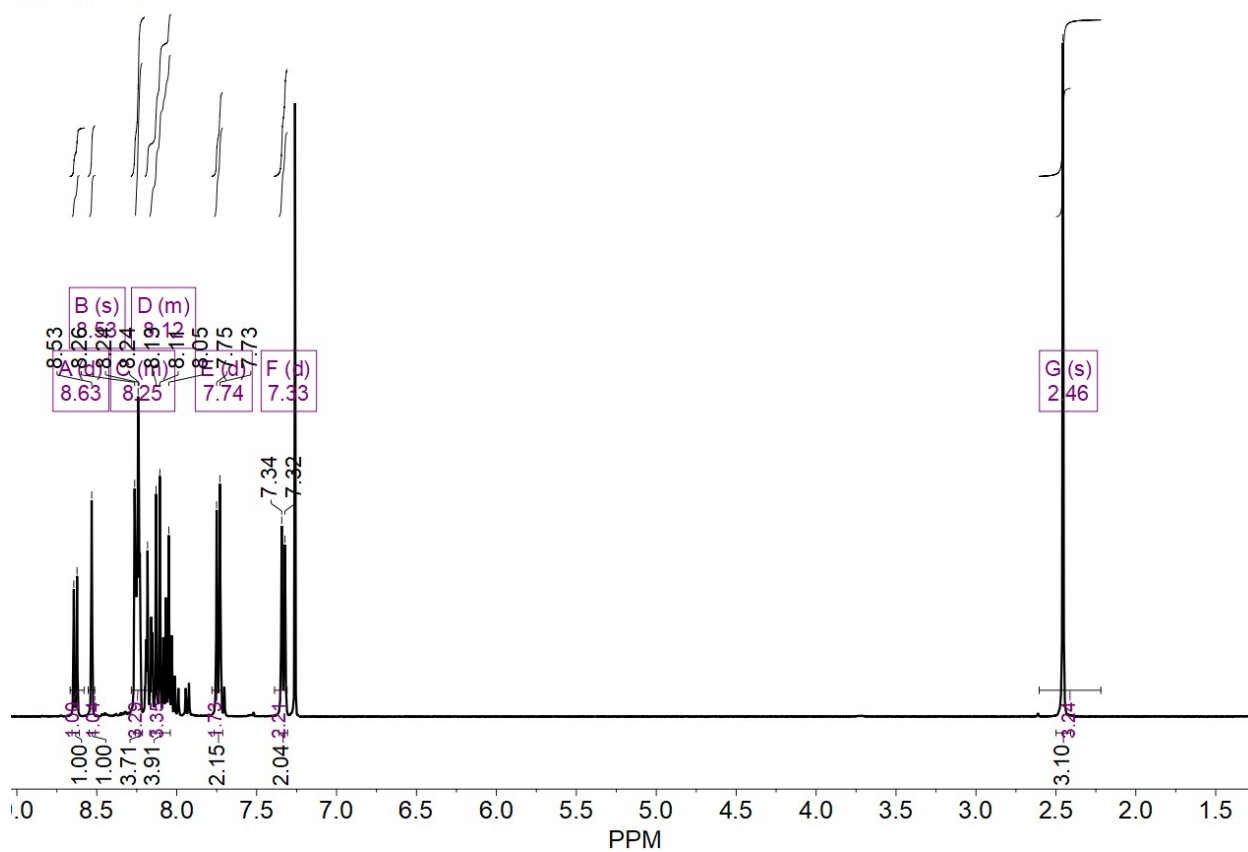

**Figure S3.**  $^1\text{H}$ NMR of PTN

$^1\text{H}$  NMR (400 MHz, Chloroform-*d*)  $\delta$  8.63 (d,  $J = 8.1$  Hz, 1H), 8.53 (s, 1H), 8.28 – 8.20 (m, 4H), 8.20 – 8.04 (m, 4H), 7.74 (d,  $J = 8.2$  Hz, 2H), 7.33 (d,  $J = 8.0$  Hz, 2H), 2.46 (s, 3H).

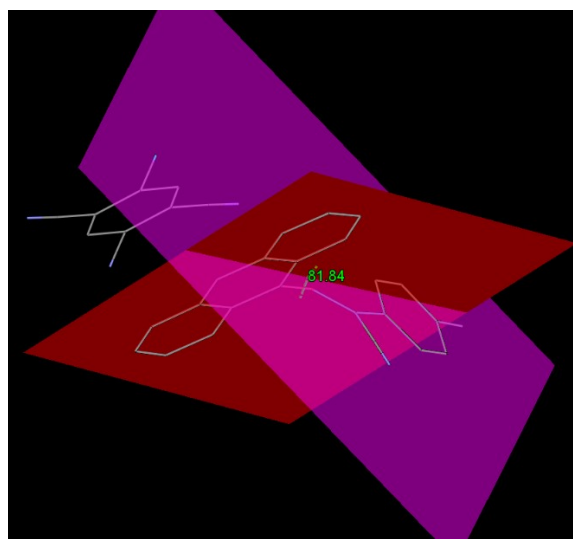

**Figure S4.** Twisted angle between two planes of anthracene and phenyl planes are 81.84 for **1b** co-crystal.

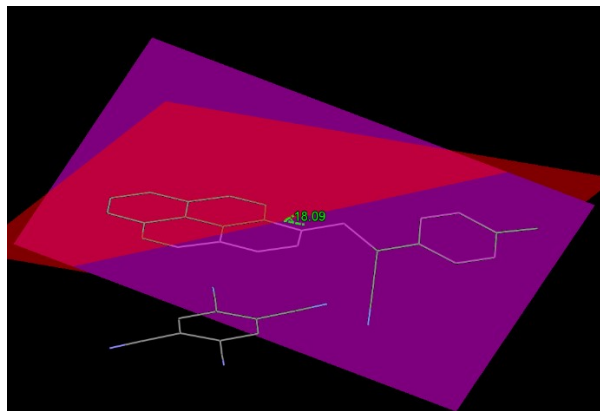

**Figure S5.** Twisted angle between two planes of anthracene and phenyl planes are 18.09 for **1c** co-crystal

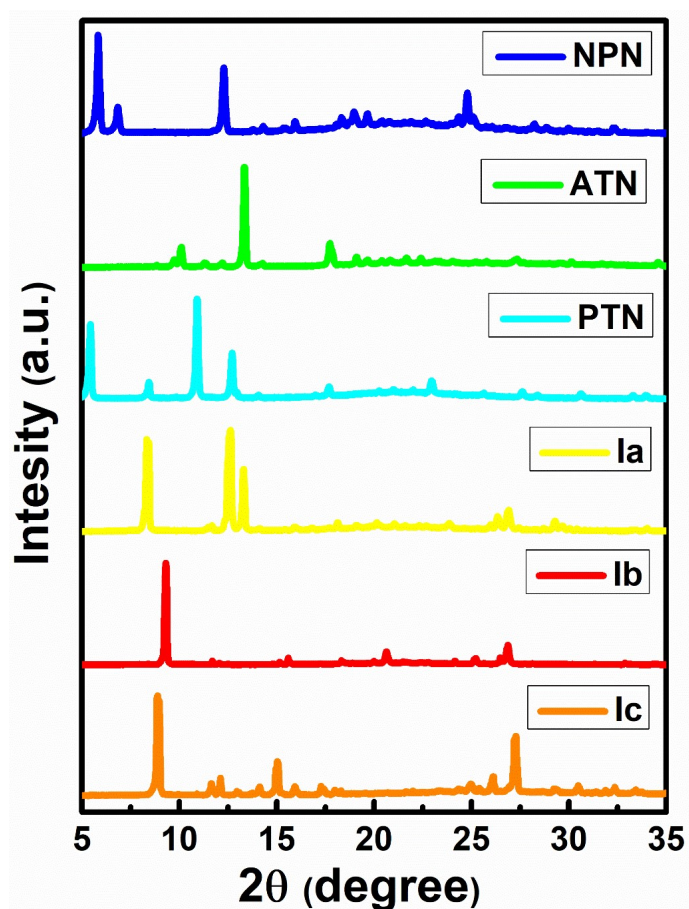

**Figure S6.** Comparison of experimental PXRD patterns of the cocrystals and the corresponding starting materials

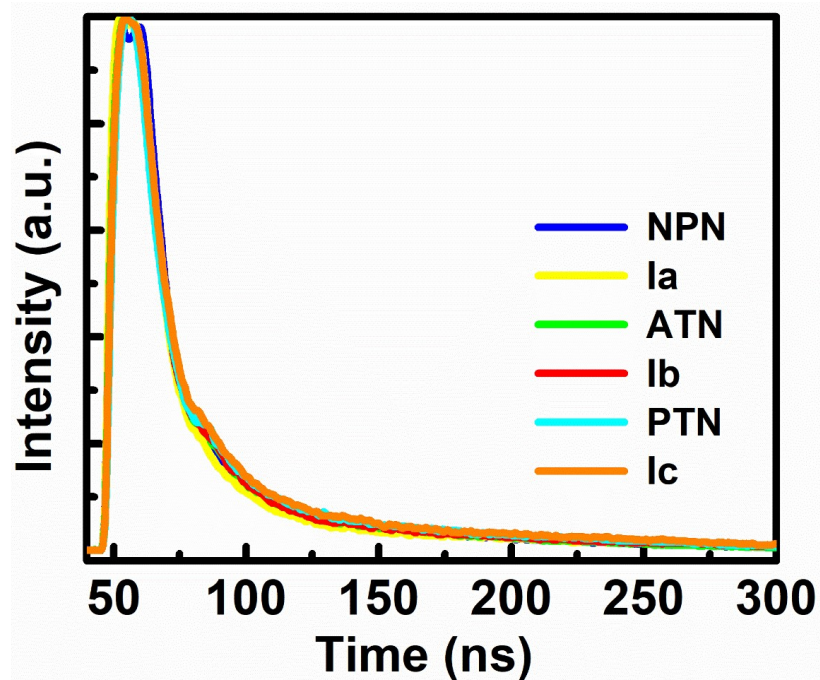

**Figure S7.** Fluorescence decay curves for solid-state CS-based products

**Table S1.** QY and life time values of the physical mixture

| Code                                   | Ia (1:1) | Ib (1:2) | Ic (1:2) |
|----------------------------------------|----------|----------|----------|
| PLQY $\Phi_F$ (%) for physical mixture | 6.04     | 4.04     | 6.42     |
| Fluorescence lifetime $\tau_F$ (ns)    | 10.05    | 8.26     | 10.18    |
